# Supplementary material
Source: PubMed Central journal article supplement (PMC3819453)
Supplement: NIHMS514773-supplement-01.pdf [file NIHMS514773-supplement-01.pdf]

## APPENDIX

**eTable 1. Target Daily Doses of Medications with Demonstrated Efficacy in AMI**

| <b>Medication</b>                                      | <b>Target Dose</b> | <b>Trial Demonstrating Efficacy</b>                                           |
|--------------------------------------------------------|--------------------|-------------------------------------------------------------------------------|
| <b><u>Beta Blockers</u></b>                            |                    |                                                                               |
| Atenolol                                               | 100 mg             | ISIS-1 (1986)(1)                                                              |
| Metoprolol                                             | 200 mg             | Hjalmarson et al. (1981)(2), Lopressor Intervention Trial (1987)(3)           |
| Carvedilol                                             | 50 mg              | CAPRICORN (2001)(4)                                                           |
| Propranolol                                            | 180 mg             | Beta Blocker Heart Attack Trial (1982)(5)                                     |
| <b><u>Angiotensin Converting Enzyme Inhibitors</u></b> |                    |                                                                               |
| Captopril                                              | 150 mg             | SAVE study (1992)(6)                                                          |
| Enalapril                                              | 20 mg              | CONSENSUS II (1992)(7), SOLVD-Prevention (1992)(8), SOLVD-Treatment (1991)(9) |
| Fosinopril                                             | 40 mg              | FEST (1995)(10), FAMIS (1998)(11)                                             |
| Lisinopril                                             | 20 mg              | GISSI-3 (1994)(12); ATLAS (1999)(13)                                          |
| Perindopril                                            | 8 mg               | EUROPA (2003)(14)                                                             |
| Quinapril                                              | 20 mg              | QUIET (2001)(15)                                                              |
| Ramipril                                               | 10 mg              | AIRE (1993)(16)                                                               |
| Trandolapril                                           | 4 mg               | TRACE (1995)(17)                                                              |
| <b><u>Angiotensin II Receptor Blockers</u></b>         |                    |                                                                               |
| Candesartan                                            | 32 mg              | CHARM-Alternative (2003)(18)                                                  |
| Telmisartan                                            | 80 mg              | ONTARGET (2008)(19)                                                           |
| Valsartan                                              | 320 mg             | VALIANT (2003)(20)                                                            |

All beta-blocker and statin trials and the majority of ACE/ARB trials were acute therapy studies, wherein the medication was started during the acute phase of the AMI and target dose was attempted during hospitalization (50% of acute therapy trials) or within 4 weeks of discharge. In the few chronic therapy trials, target dose attainment was attempted within 4 weeks of initiation.

**eTable 2. Mean Achieved Doses in the Trials Demonstrating Efficacy for AMI**

| <b>Clinical Trial</b>           | <b>Medication</b> | <b>Target Dose</b> | <b>Mean Achieved Dose (% of target)</b> | <b>% Achieving Target Dose</b> |
|---------------------------------|-------------------|--------------------|-----------------------------------------|--------------------------------|
| ISIS-1                          | Atenolol          | 100 mg             | 79 mg (79%)                             | 66%                            |
| CAPRICORN                       | Carvedilol        | 50 mg              | 40 mg (80%)                             |                                |
| Beta Blocker Heart Attack Trial | Propranolol       | 180 mg             | 191 mg (106%)*                          |                                |
| SAVE                            | Captopril         | 150 mg             |                                         | 79%                            |
| CONSENSUS 2                     | Enalapril         | 20 mg              |                                         | 82%                            |
| FAMIS                           | Fosinopril        | 20 mg              | 18.3 mg (92%)                           | 87%                            |
| EUROPA                          | Perindopril       | 8 mg               | 7.7 mg (96%)                            |                                |
| CHARM-Alternative               | Candesartan       | 32 mg              |                                         | 72%                            |
| ONTARGET                        | Telmisartan       | 80 mg              |                                         | 89%                            |
| VALIANT                         | Valsartan         | 320 mg             |                                         | 77%                            |

\*Patients were allowed to be on 180 mg or 240 mg

**eTable 3. Statin Dose Categories According to Potency**

| <b>Dose</b>     | <b><u>Medication</u></b> |                    |                   |                    |                     |                    |
|-----------------|--------------------------|--------------------|-------------------|--------------------|---------------------|--------------------|
|                 | <b>Atorvastatin</b>      | <b>Fluvastatin</b> | <b>Lovastatin</b> | <b>Pravastatin</b> | <b>Rosuvastatin</b> | <b>Simvastatin</b> |
| <b>Low</b>      | 10 mg                    | 10-40 mg           | 10-20mg           | 10-20 mg           | 5 mg                | 10-20mg            |
| <b>Moderate</b> | 20 mg                    | 80 mg              | 40 mg             | 40 mg              | 10mg                | 40mg               |
| <b>Goal*</b>    | 40-80mg                  |                    | 80 mg             | 80 mg              | 20-40mg             | 80 mg              |

\*Goal is considered  $\geq 75\%$  of maximal statin potency (~50-60% LDL reduction)

**eTable 4. Medication Dose Strength at Hospital Discharge and Follow-up.** A medication was considered at goal if the dose was at least 75% of the target dose (i.e., dose with proven efficacy from clinical trials). A dose that was 50-74% of target was considered moderate, whereas doses below 50% of target were considered low.

| <b>Beta-blockers</b>      | <b>Follow-up Dose Category</b> |                           |            |                 |             |              |
|---------------------------|--------------------------------|---------------------------|------------|-----------------|-------------|--------------|
| <b>Discharge Dose</b>     | <b>None</b>                    | <b>On Med/No Titrated</b> | <b>Low</b> | <b>Moderate</b> | <b>Goal</b> | <b>Total</b> |
| <b>None</b>               | 112                            | 18                        | 55         | 23              | 21          | 229          |
| <b>On Med/No Titrated</b> | 217                            | 498                       | 0          | 0               | 31          | 746          |
| <b>Low</b>                | 506                            | 0                         | 761        | 255             | 81          | 1603         |
| <b>Moderate</b>           | 186                            | 0                         | 143        | 307             | 64          | 700          |
| <b>Goal</b>               | 138                            | 27                        | 63         | 103             | 201         | 532          |
| <b>Total</b>              | 1159                           | 543                       | 1022       | 688             | 398         | 3810         |
| <b>Statins</b>            | <b>Follow-up Dose Category</b> |                           |            |                 |             |              |
| <b>Discharge Dose</b>     | <b>None</b>                    | <b>On Med/No Titrated</b> | <b>Low</b> | <b>Moderate</b> | <b>Goal</b> | <b>Total</b> |
| <b>None</b>               | 331                            |                           | 83         | 99              | 66          | 579          |
| <b>Low</b>                | 281                            |                           | 420        | 201             | 76          | 978          |
| <b>Moderate</b>           | 498                            |                           | 119        | 713             | 239         | 1569         |
| <b>Goal</b>               | 528                            |                           | 49         | 185             | 848         | 1610         |
| <b>Total</b>              | 1638                           |                           | 671        | 1198            | 1229        | 4736         |
| <b>ACE/ARBs</b>           | <b>Follow-up Dose Category</b> |                           |            |                 |             |              |
| <b>Discharge Dose</b>     | <b>None</b>                    | <b>On Med/No Titrated</b> | <b>Low</b> | <b>Moderate</b> | <b>Goal</b> | <b>Total</b> |
| <b>None</b>               | 31                             | 7                         | 5          | 6               | 10          | 59           |
| <b>On Med/No Titrated</b> | 45                             | 60                        | 0          | 0               | 15          | 120          |
| <b>Low</b>                | 44                             | 0                         | 31         | 9               | 16          | 100          |
| <b>Moderate</b>           | 30                             | 0                         | 7          | 36              | 31          | 104          |
| <b>Goal</b>               | 51                             | 8                         | 3          | 4               | 80          | 146          |
| <b>Total</b>              | 201                            | 75                        | 46         | 55              | 152         | 529          |

Patients on medication but with SBP <110 mmHg were excluded from the up-titration analyses

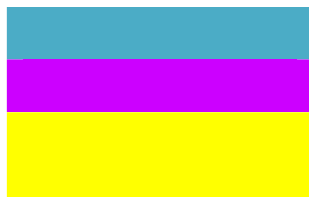

Follow-up dose is lower than discharge dose

Follow-up dose is the same than discharge dose

Follow-up dose is higher than discharge dose (i.e., up-titration)

eFigure 1. Outpatient Cardiology Follow-up Intensity

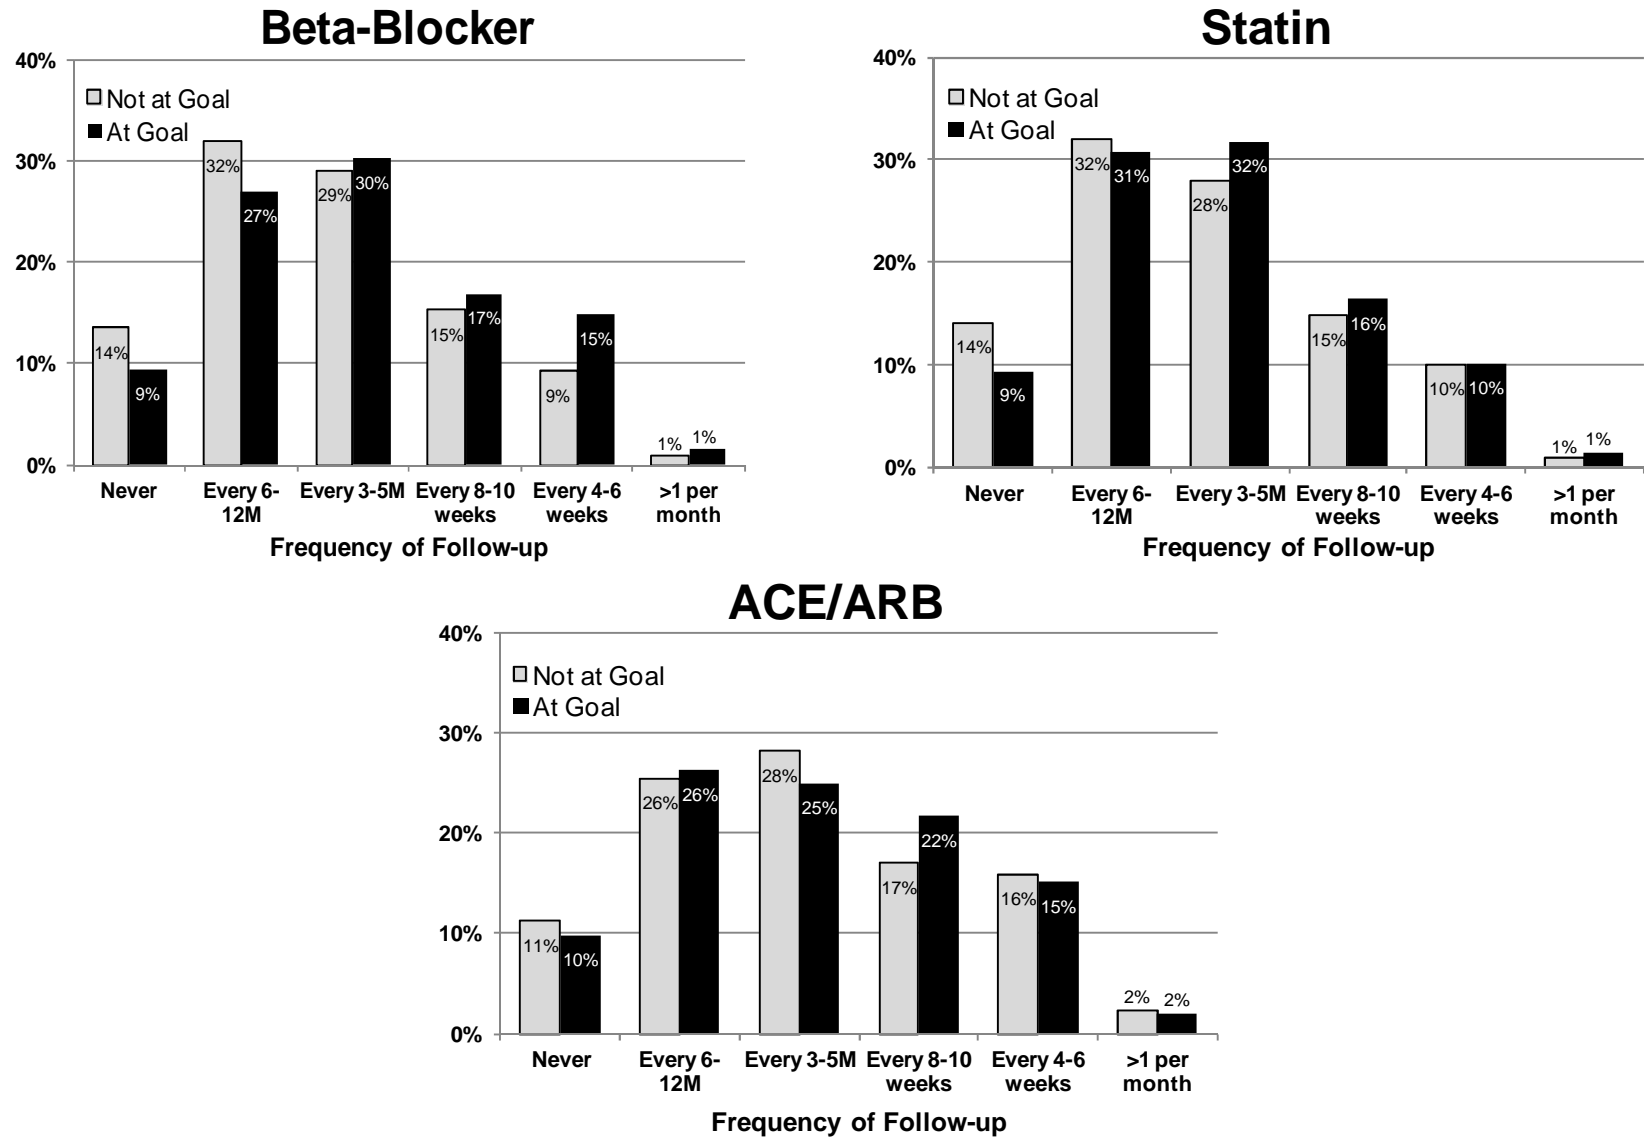

**eTable 5. Patient and Treatment Factors Associated with Goal Dose at Follow-up. Sensitivity Analyses**

|                          | <u>Beta Blocker</u>                                                |                  | <u>Statin</u>            |                  | <u>ACE/ARB</u>           |                  |
|--------------------------|--------------------------------------------------------------------|------------------|--------------------------|------------------|--------------------------|------------------|
|                          | OR (95% CI)                                                        | p-value          | OR (95% CI)              | p-value          | OR (95% CI)              | p-value          |
| <b>Dose at discharge</b> | <b><u>MAIN ANALYSES</u></b>                                        |                  |                          |                  |                          |                  |
| Low dose                 | <b>0.50 (0.30-0.83)</b>                                            | <b>0.008</b>     | <b>0.67 (0.47-0.95)</b>  | <b>0.024</b>     | 0.86 (0.34-2.15)         | 0.748            |
| Moderate dose            | 0.93 (0.55-1.59)                                                   | 0.799            | <b>1.36 (1.01-1.82)</b>  | <b>0.043</b>     | 1.83 (0.78-4.27)         | 0.162            |
| Goal dose                | <b>6.08 (3.70-10.01)</b>                                           | <b>&lt;0.001</b> | <b>8.22 (6.20-10.90)</b> | <b>&lt;0.001</b> | <b>5.80 (2.56-13.16)</b> | <b>&lt;0.001</b> |
| <b>Dose at discharge</b> | <b><u>ADDING DISCHARGE LDL-C LEVELS</u></b>                        |                  |                          |                  |                          |                  |
| Low dose                 | NA                                                                 |                  | <b>0.67 (0.47-0.95)</b>  | <b>0.025</b>     | NA                       |                  |
| Moderate dose            | NA                                                                 |                  | 1.34 (1.00-1.81)         | 0.051            | NA                       |                  |
| Goal dose                | NA                                                                 |                  | <b>8.03 (6.05-10.65)</b> | <b>&lt;0.001</b> | NA                       |                  |
| <b>Dose at discharge</b> | <b><u>LIMITING ANALYSES TO PATIENTS WITHOUT LV DYSFUNCTION</u></b> |                  |                          |                  |                          |                  |
| Low dose                 | <b>0.50 (0.30-0.83)</b>                                            | <b>0.007</b>     | NA                       |                  | NA                       |                  |
| Moderate dose            | 0.93 (0.54-1.57)                                                   | 0.774            | NA                       |                  | NA                       |                  |
| Goal dose                | <b>5.94 (3.62-9.75)</b>                                            | <b>&lt;0.001</b> | NA                       |                  | NA                       |                  |

## REFERENCES FOR APPENDIX

1. Randomised trial of intravenous atenolol among 16 027 cases of suspected acute myocardial infarction: ISIS-1. First International Study of Infarct Survival Collaborative Group. *Lancet* 1986;2:57-66.
2. Hjalmarson A, Elmfeldt D, Herlitz J, et al. Effect on mortality of metoprolol in acute myocardial infarction. A double-blind randomised trial. *Lancet* 1981;2:823-7.
3. The Lopressor Intervention Trial: multicentre study of metoprolol in survivors of acute myocardial infarction. Lopressor Intervention Trial Research Group. *Eur Heart J* 1987;8:1056-64.
4. Dargie HJ. Effect of carvedilol on outcome after myocardial infarction in patients with left-ventricular dysfunction: the CAPRICORN randomised trial. *Lancet* 2001;357:1385-90.
5. A randomized trial of propranolol in patients with acute myocardial infarction. I. Mortality results. *JAMA* 1982;247:1707-14.
6. Pfeffer MA, Braunwald E, Moye LA, et al. Effect of captopril on mortality and morbidity in patients with left ventricular dysfunction after myocardial infarction. Results of the survival and ventricular enlargement trial. The SAVE Investigators. *N Engl J Med* 1992;327:669-77.
7. Swedberg K, Held P, Kjeksus J, Rasmussen K, Ryden L, Wedel H. Effects of the early administration of enalapril on mortality in patients with acute myocardial infarction. Results of the Cooperative New Scandinavian Enalapril Survival Study II (CONSENSUS II). *N Engl J Med* 1992;327:678-84.
8. Effect of enalapril on mortality and the development of heart failure in asymptomatic patients with reduced left ventricular ejection fractions. The SOLVD Investigators. *N Engl J Med* 1992;327:685-91.
9. Effect of enalapril on survival in patients with reduced left ventricular ejection fractions and congestive heart failure. The SOLVD Investigators. *N Engl J Med* 1991;325:293-302.
10. Erhardt L, MacLean A, Ilgenfritz J, Gelperin K, Blumenthal M. Fosinopril attenuates clinical deterioration and improves exercise tolerance in patients with heart failure. Fosinopril Efficacy/Safety Trial (FEST) Study Group. *Eur Heart J* 1995;16:1892-9.
11. Borghi C, Marino P, Zardini P, Magnani B, Collatina S, Ambrosioni E. Short- and long-term effects of early fosinopril administration in patients with acute anterior myocardial infarction undergoing intravenous thrombolysis: results from the Fosinopril in Acute Myocardial Infarction Study. FAMIS Working Party. *Am Heart J* 1998;136:213-25.
12. GISSI-3: effects of lisinopril and transdermal glyceryl trinitrate singly and together on 6-week mortality and ventricular function after acute myocardial infarction. Gruppo Italiano per lo Studio della Sopravvivenza nell'infarto Miocardico. *Lancet* 1994;343:1115-22.
13. Packer M, Poole-Wilson PA, Armstrong PW, et al. Comparative effects of low and high doses of the angiotensin-converting enzyme inhibitor, lisinopril, on morbidity and mortality in chronic heart failure. ATLAS Study Group. *Circulation* 1999;100:2312-8.
14. Fox KM. Efficacy of perindopril in reduction of cardiovascular events among patients with stable coronary artery disease: randomised, double-blind, placebo-controlled, multicentre trial (the EUROPA study). *Lancet* 2003;362:782-8.

15. Pitt B, O'Neill B, Feldman R, et al. The QUinapril Ischemic Event Trial (QUIET): evaluation of chronic ACE inhibitor therapy in patients with ischemic heart disease and preserved left ventricular function. *Am J Cardiol* 2001;87:1058-63.
16. Effect of ramipril on mortality and morbidity of survivors of acute myocardial infarction with clinical evidence of heart failure. The Acute Infarction Ramipril Efficacy (AIRE) Study Investigators. *Lancet* 1993;342:821-8.
17. Kober L, Torp-Pedersen C, Carlsen JE, et al. A clinical trial of the angiotensin-converting-enzyme inhibitor trandolapril in patients with left ventricular dysfunction after myocardial infarction. Trandolapril Cardiac Evaluation (TRACE) Study Group. *N Engl J Med* 1995;333:1670-6.
18. Granger CB, McMurray JJ, Yusuf S, et al. Effects of candesartan in patients with chronic heart failure and reduced left-ventricular systolic function intolerant to angiotensin-converting-enzyme inhibitors: the CHARM-Alternative trial. *Lancet* 2003;362:772-6.
19. Yusuf S, Teo KK, Pogue J, et al. Telmisartan, ramipril, or both in patients at high risk for vascular events. *N Engl J Med* 2008;358:1547-59.
20. Pfeffer MA, McMurray JJ, Velazquez EJ, et al. Valsartan, captopril, or both in myocardial infarction complicated by heart failure, left ventricular dysfunction, or both. *N Engl J Med* 2003;349:1893-906.
